# Supplementary material for: Large Igneous Province thermogenic greenhouse gas flux could have initiated Paleocene-Eocene Thermal Maximum climate change
Source: Nat Commun. 2019 Dec 5;10:5547. doi: 10.1038/s41467-019-12957-1 (PMC6895149; doi:10.1038/s41467-019-12957-1)
Supplement: Supplementary file 1 — Supplementary Information [file 41467_2019_12957_MOESM1_ESM.pdf]

## Supplementary Information

### **Large Igneous Province thermogenic greenhouse gas flux could have initiated Paleocene-Eocene Thermal Maximum climate change**

S. M. Jones et al.

#### **Contents of this file**

Supplementary Figures 1 to 6.

Supplementary Tables 1 and 2.

#### **Other supplementary information available online**

Supplementary Movie 1.

## Supplementary Figures

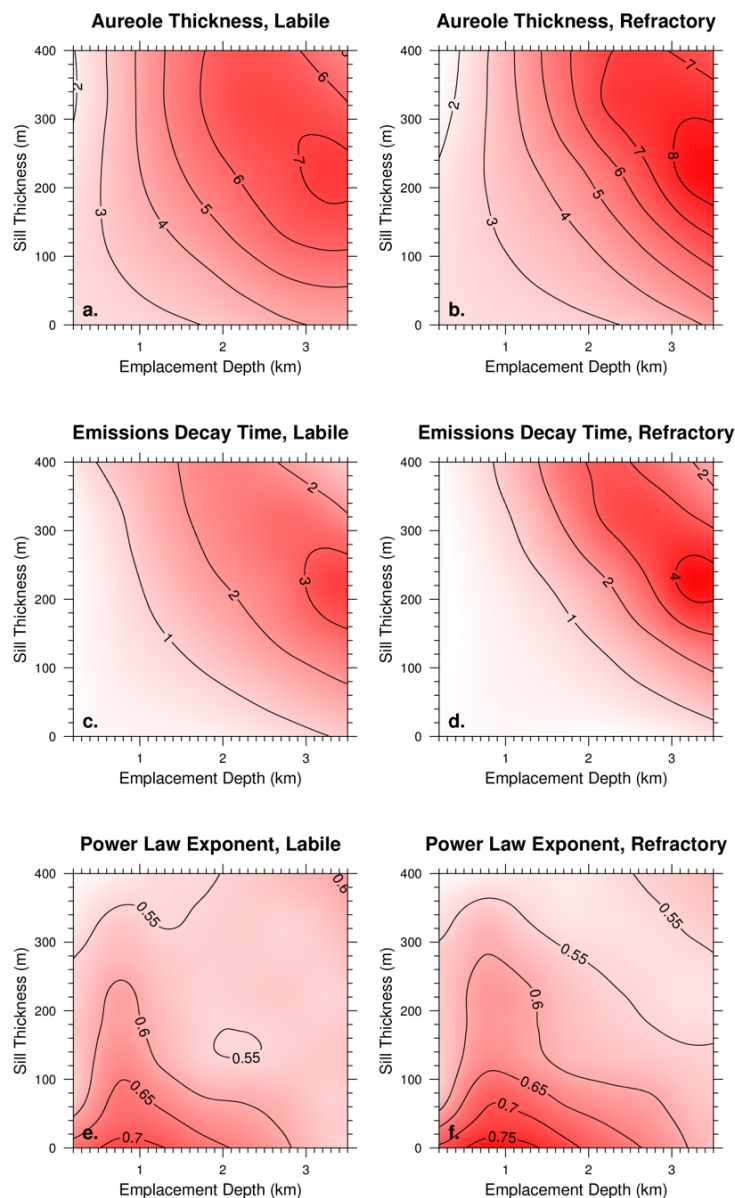

**Supplementary Fig. 1. Dependence of carbon emissions parameterisation on sill thickness and emplacement depth.**

**a.** Total thickness  $Y_{\text{crack}}$  of the reaction aureoles above and below the sill for generation of gas by breakdown of labile kerogen, expressed in multiples of sill thickness. Calculations assume that 20% of kerogen matures directly to gas, and the remaining 80% first matures to oil which then cracks to gas<sup>31</sup>. **b.** Aureole thickness  $Y_{\text{ref}}$  for breakdown of refractory kerogen, all of which matures directly to gas. **c.** Time scale  $\tau_{\text{decay}}$  for decay of gas emissions from breakdown of labile kerogen, expressed in multiples of the thermal conduction time scale  $\tau_{\text{cond}} = S^2/\kappa$ , where  $S$  is the sill thickness and  $\kappa = 10^6 \text{ m}^2 \text{ s}^{-1}$  is the thermal diffusivity of the host rock. **d.** Time scale  $\tau_{\text{decay}}$  for decay of gas emissions from breakdown of refractory kerogen, similarly labelled. **e, f.** Power law exponent  $p$  for the breakdown on labile and refractory kerogen respectively.

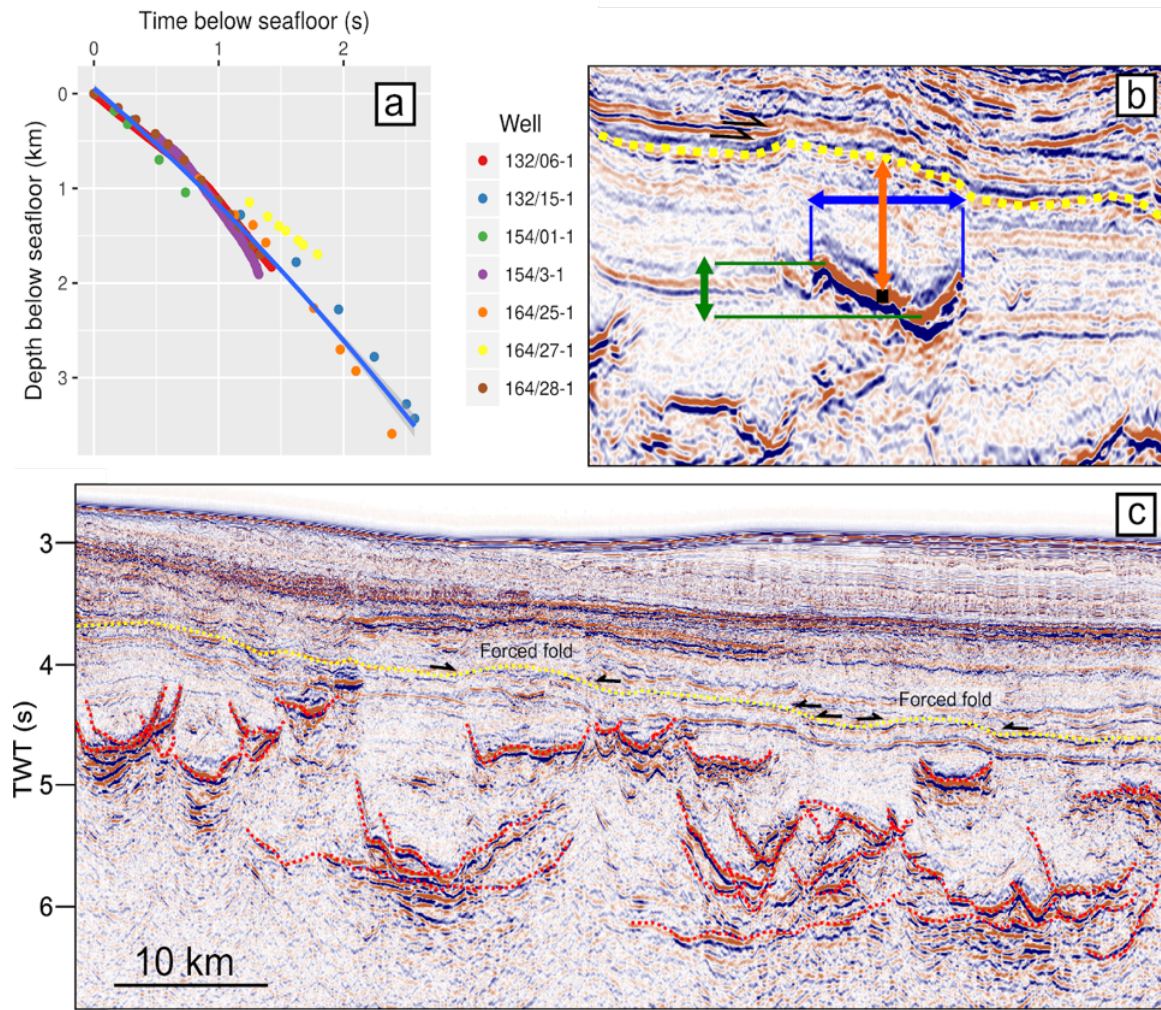

**Supplementary Fig. 2. Example of seismic data used to measure sill dimensions.**

**a.** Checkshot surveys from industry wells in Rockall Basin used to depth-covert the measurements. Blue line is the best-fit second order polynomial, used for depth conversion. **b.** Definition of measurements: blue, sill diameter; orange, sill emplacement depth (yellow dashed line is palaeo-seafloor); green, transgressive height. **c.** Example 2D seismic line across part of northern Rockall Basin from a publicly available UK Oil and Gas Authority survey (see ref. <sup>54</sup> for how to access data). Sills are in red and palaeo-seafloor is in yellow. Black arrows indicate onlap onto forced folds that identify the seabed at the time of sill intrusion. Note that all sills (where timing information is available) intruded coeval with the yellow dashed horizon at seismic imaging resolution.

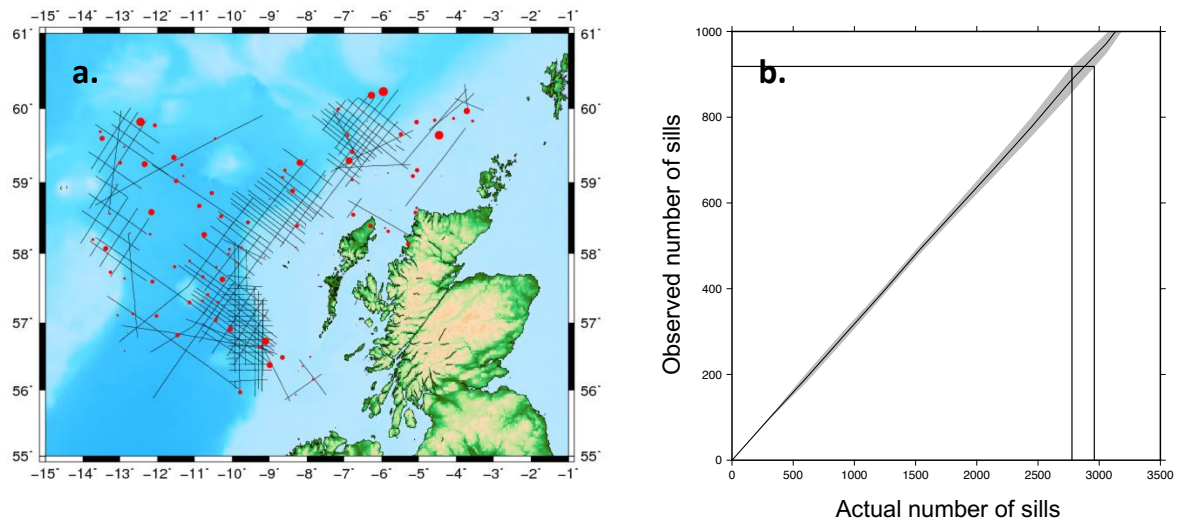

**Supplementary Fig. 3. The "Missing sills test" to determine sill intrusion density from 2D seismic surveys.**

**a.** One out of 1200 runs of the Monte Carlo missing sills test for the OGA 2D seismic survey. The survey geometry (lines) is overlain by a synthetic population of sills (red dots) randomly distributed across the survey footprint and with surface areas drawn from the observed distribution. **b.** Number of sills that intersect one or more seismic lines as a function of number of synthetic sills in the population, including uncertainty range obtained from Monte Carlo modelling. The estimated total number of sills is found to be a linear function of the number of sills observed to intersect the 2D grid. The slope of this correlation depends on the surface area distribution of the sill population and the geometry of the seismic grid, so it is different for each 2D survey. The final estimate for the real number of sills is found by projecting horizontally from the observed number of sills (920 in this case) to the line resulting from Monte Carlo modelling, and then vertically.

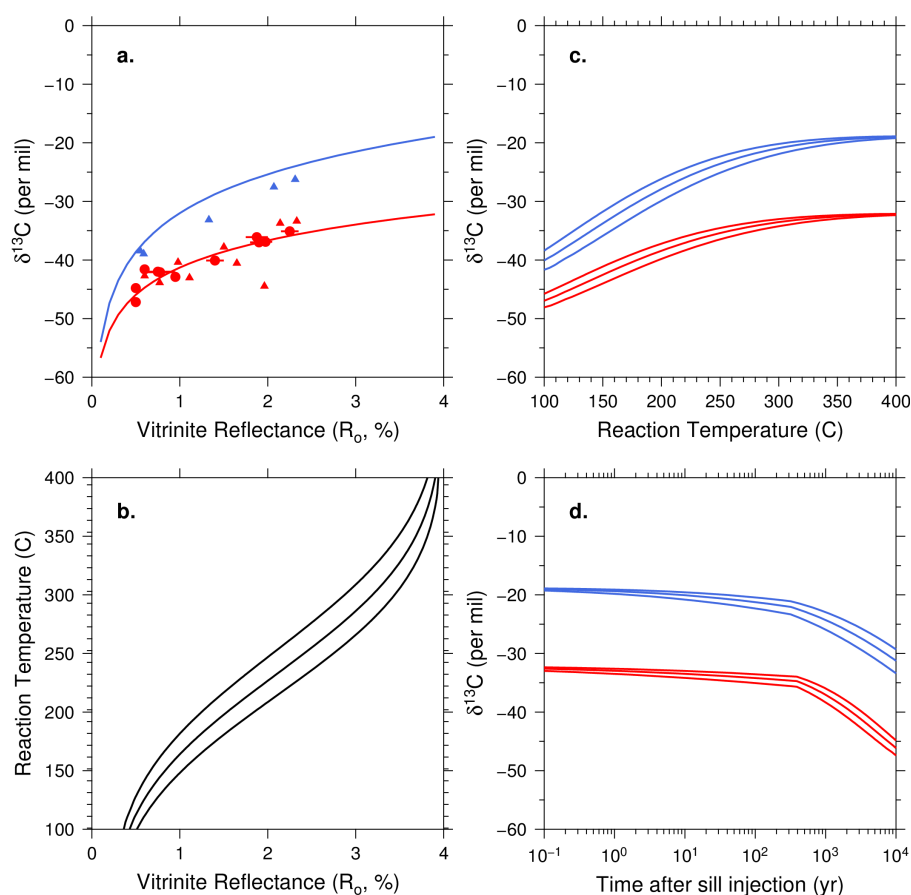

**Supplementary Fig. 4. Carbon isotopic compositional variation with kerogen type and maturation temperature.**

Blue and red colours indicate gas generation from labile (oil-prone) and refractory (gas-prone) kerogen respectively. **a.** Laboratory data and parameterized relationships between isotopic composition and vitrinite reflectance, a proxy for thermal maturity: circles from<sup>52</sup>; triangles from C. Snape (pers. comm.). Red line is the relationship given in<sup>52</sup> and the blue line is a modified version. **b.** Temperature and vitrinite reflectance at the site of maximum gas generation flux (close to the leading edge of the reaction aureole in Fig. 2), obtained from the coupled thermal-kinetic reaction model for a 200 m thick sill intruded at 5 km. The 3 curves are for heating rates of 0.1, 1 and 10  $^{\circ}\text{C Myr}^{-1}$  (lower to upper). **c.** Composition-temperature relationship from combining the relationships in a. and b. **d.** Corresponding composition-time function: these relationships were used to model combined emissions from the NAIP sill province (Fig. 8).

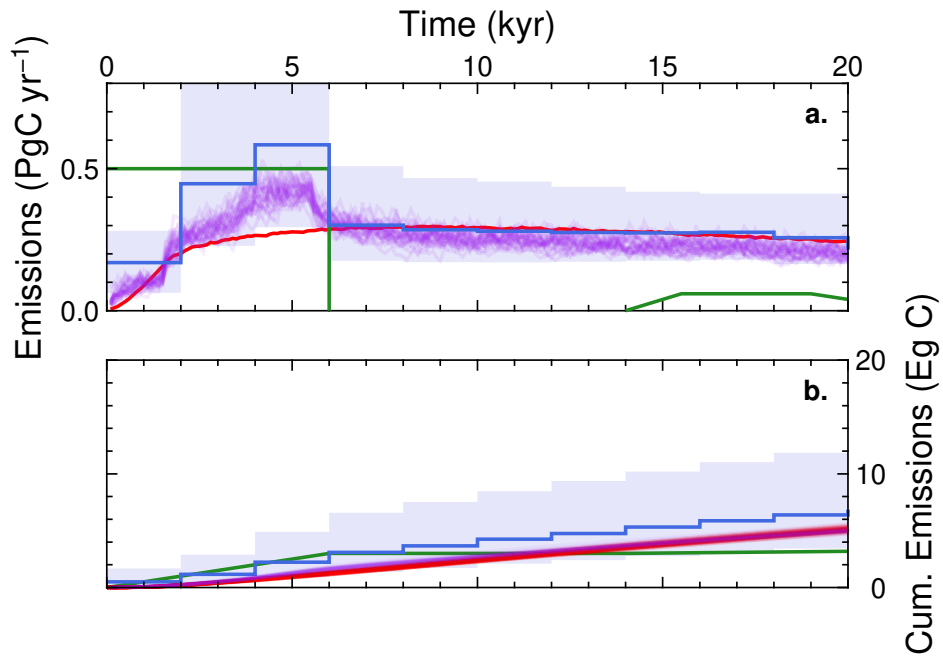

**Supplementary Fig. 5. Test of effect of spatial sill distribution on shape of emissions flux peak.**

NAIP carbon emissions based on mantle convection model, and comparison with climate-based emissions reconstructions. **a.** Blue line/envelope, emissions flux from joint inverse modelling of oceanic pH and carbon isotope records<sup>5</sup>. Purple cloud: 30 simulated NAIP emissions flux histories calculated in the same way as the red cloud in Fig. 8a, except that the  $\rho$  distribution is estimated from the blue line<sup>5</sup> using equation 47 (Fig. 7c,d, grey line). Red line, mean of red cloud in Fig. 8a, which assumed a smooth Gaussian distribution through the  $\rho$  measurements (Fig. 7c,d, black line). Green line, emissions from forward modelling of carbon isotope and deep-sea carbonate dissolution records<sup>6,13</sup>. **b.** Cumulative emissions associated with a.

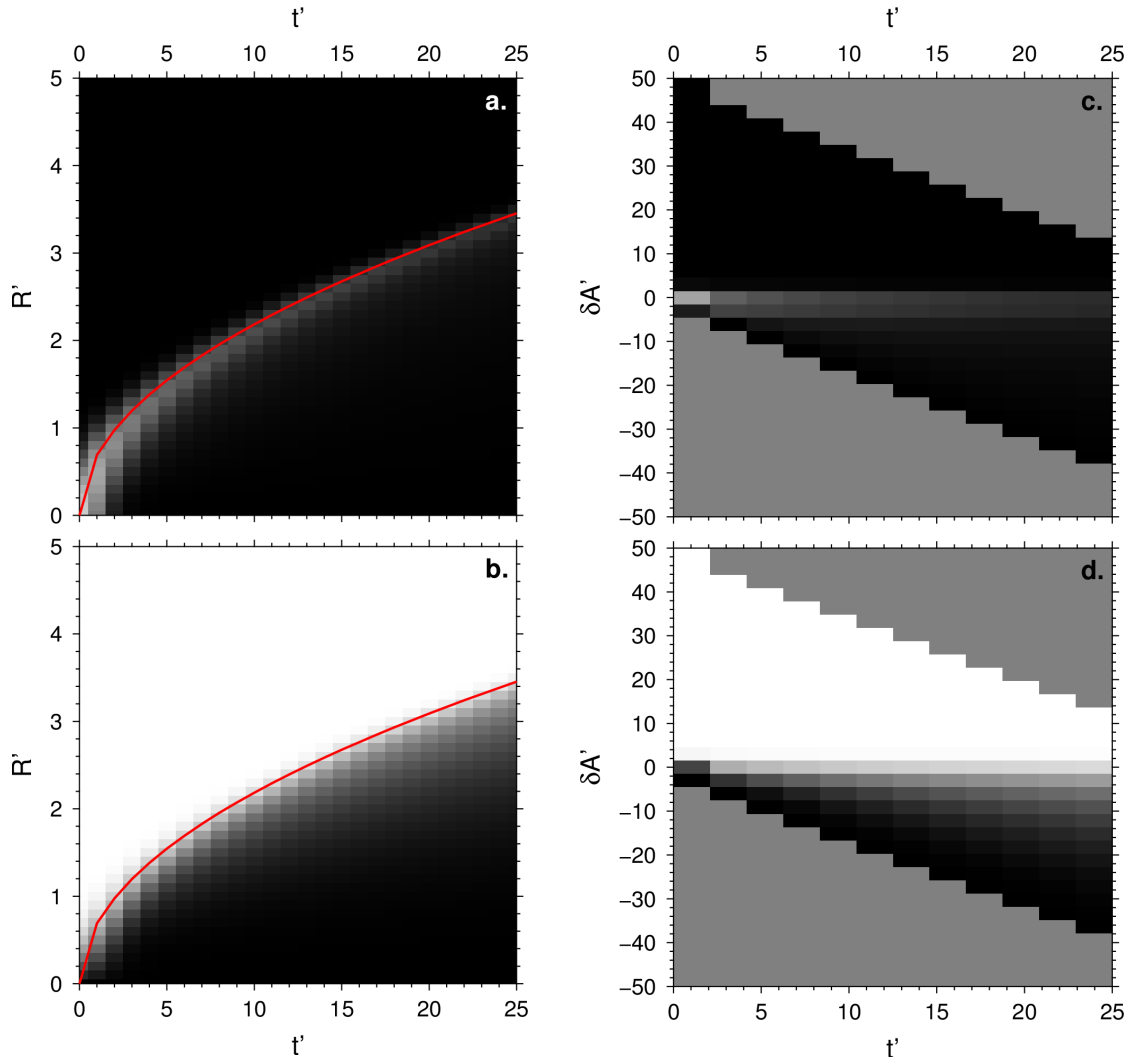

**Supplementary Fig. 6. Probability distribution for determining sill radial coordinate in NAIP sill province animations.**

**a.** Probability density function formed from mean plume head temperature plotted as a function of scaled radius  $R' = \sqrt{A'/\pi}$  and scaled time  $t'$ . Red line shows position of maximum thermal anomaly given by  $\sqrt{1.5t'/\pi}$ . **b.** Cumulative probability function formed from a. **c.** Probability density function a. re-plotted on axes of deviation in scaled area with respect to marker area,  $\delta A'$ , against time relative to reference time  $1.5A'$ . **d.** Cumulative probability function formed from c.; this information was used as a look-up table to determine the sill location radius in Supplementary Movie 1.

## Supplementary Tables

**Supplementary Table 1. Kinetic parameters for thermal maturation reactions.**

| Reaction Group | $A_E$<br>$s^{-1}$     | $E_a$<br>$kJ\ mol^{-1}$ | $\sigma$<br>$kJ\ mol^{-1}$ | $N_E$ |
|----------------|-----------------------|-------------------------|----------------------------|-------|
| RG1 (31)       | $1.58 \times 10^{13}$ | 208                     | 5                          | 7     |
| RG2 (31)       | $1.83 \times 10^{18}$ | 279                     | 13                         | 21    |
| RG3 (32)       | $4.00 \times 10^{10}$ | 242                     | 41                         | 55    |
| RG4 (31)       | $1.00 \times 10^{13}$ | 230                     | 4                          | 7     |

**Supplementary Table 2. Notation.**

| Symbol              |                            | Definition                                           | Typical Value | Units            |
|---------------------|----------------------------|------------------------------------------------------|---------------|------------------|
| $d$                 |                            | Distance between sill centres                        |               | km               |
| $d_{\text{grain}}$  |                            | Density of solid rock grains                         | 2650          | $kg\ m^{-3}$     |
| $d_{\text{host}}$   |                            | Bulk density of host rock                            | 2110          | $kg\ m^{-3}$     |
| $d_{\text{magma}}$  |                            | Density of sill magma                                | 2750          | $kg\ m^{-3}$     |
| $d_{\text{water}}$  |                            | Density of pore water                                | 1030          | $kg\ m^{-3}$     |
| $f$                 | $= 1/\tau_{\text{repeat}}$ | Frequency of sill intrusion                          |               | $yr^{-1}$        |
| $f_z$               |                            | Asthenosphere velocity profile function              |               | –                |
| $k$                 |                            | Reaction rate                                        |               | $s^{-1}$         |
| $m_{\text{magma}}$  |                            | Cumulative magmatic C mass from 1 sill               |               | Pg C             |
| $m_{\text{therm}}$  |                            | Cumulative thermogenic C mass from 1 sill            |               | Pg C             |
| $n$                 |                            | Number of sills                                      |               | –                |
| $p$                 |                            | Power-law exponent for thermogenic C generation      |               | –                |
| $q_{\text{magma}}$  |                            | Flux of magmatic C from one sill                     |               | $Pg\ C\ yr^{-1}$ |
| $q_{\text{therm}}$  |                            | Flux of thermogenic C from one sill                  |               | $Pg\ C\ yr^{-1}$ |
| $r$                 |                            | Radial coordinate                                    |               | km               |
| $t$                 |                            | Time (relative to start of sill province)            |               | yr               |
| $t_0$               |                            | Time of sill intrusion                               |               | yr               |
| $\Delta t$          | $= t - t_0$                | Time relative to sill intrusion                      |               | yr               |
| $w_{\text{CH}_4}$   |                            | Weight% host rock organic C that converts to methane |               | %                |
| $w_{\text{CO}_2}$   |                            | Weight% mantle C dissolved in sill magma             | 0.5           | %                |
| $z$                 |                            | Depth coordinate                                     |               | km               |
| $A$                 |                            | Sill surface area                                    |               | $km^2$           |
| $A_{\text{mantle}}$ |                            | Area of mantle plume head                            |               |                  |
| $A_E$               |                            | Frequency factor                                     |               | $km^2$           |

|                      |  |                                                                     |                  |                                     |
|----------------------|--|---------------------------------------------------------------------|------------------|-------------------------------------|
| $A_{LIP}$            |  | Area of LIP sill province                                           |                  |                                     |
| $A_O$                |  | Overlap between sill aureole footprints                             |                  |                                     |
| $B$                  |  | Rate of sediment burial                                             |                  | km yr <sup>-1</sup>                 |
| $C$                  |  | Rate of oil generation                                              |                  | s <sup>-1</sup>                     |
| $E_a$                |  | Activation Energy                                                   |                  | kJ mol <sup>-1</sup>                |
| $G$                  |  | Geothermal gradient                                                 | 30               | K km <sup>-1</sup>                  |
| $K$                  |  | Kerogen ratio (labile:total)                                        | 1                | –                                   |
| $L$                  |  | Latent heat of crystallisation                                      | 256              | kJ kg <sup>-1</sup>                 |
| $M_{magma}$          |  | Final magmatic C mass                                               |                  | Pg C                                |
| $M_{therm}$          |  | Final thermogenic C mass                                            |                  | Pg C                                |
| $N$                  |  | Total number of sills in the province                               |                  | –                                   |
| $N_E$                |  | Number of discrete reactions in $E_a$ distribution                  |                  | –                                   |
| $P$                  |  | Concentration of reaction product                                   |                  | –                                   |
| $P_0$                |  | Initial concentration of reaction product                           |                  | –                                   |
| $Q$                  |  | Mantle plume area flux                                              |                  | km <sup>2</sup> yr <sup>-1</sup>    |
| $Q_{prov}$           |  | Thermogenic + magmatic C flux from sill province                    |                  | Pg C yr <sup>-1</sup>               |
| $R$                  |  | Long radius of plume head                                           |                  | km                                  |
| $R_g$                |  | Gas constant                                                        | 8.31451          | J K <sup>-1</sup> mol <sup>-1</sup> |
| $R_o$                |  | Vitrinite reflectance                                               |                  | %                                   |
| $S$                  |  | Maximum sill thickness                                              |                  | m                                   |
| $T$                  |  | Temperature                                                         |                  | K                                   |
| $T_0$                |  | Temperature at the seabed                                           | 273              | K                                   |
| $Y$                  |  | Total aureole thickness scaled by $S$                               |                  | –                                   |
| $Y_{crack}$          |  | Total aureole thickness scaled by $S$ , oil cracking reaction       |                  | –                                   |
| $Y_{ref}$            |  | Total aureole thickness scaled by $S$ , refractory kerogen reaction |                  | –                                   |
| $Z$                  |  | Depth of sill intrusion                                             |                  | km                                  |
| $Z_O$                |  | Vertical overlap between sill aureoles                              |                  | km                                  |
| $\beta$              |  | Sill radial thickness variation parameter                           |                  | –                                   |
| $\delta$             |  | Standard deviation of mantle temperature pulse                      | 40               | kyr                                 |
| $\delta^{13}C$       |  | Carbon isotopic composition of emissions                            |                  | –                                   |
| $\delta^{13}_{lab}C$ |  | Carbon isotopic composition of emissions from labile kerogen        |                  | –                                   |
| $\delta^{13}_{ref}C$ |  | Carbon isotopic composition of emissions from refractory kerogen    |                  | –                                   |
| $\gamma$             |  | Plume head aspect ratio                                             |                  | –                                   |
| $\phi$               |  | Sediment porosity                                                   |                  | –                                   |
| $\phi_0$             |  | Initial sediment porosity                                           | 0.61             | –                                   |
| $\varphi$            |  | Aureole overlap volume fraction                                     |                  | –                                   |
| $\kappa$             |  | Sediment thermal diffusivity                                        | 10 <sup>-6</sup> | m <sup>2</sup> s <sup>-1</sup>      |
| $\lambda$            |  | Compaction length scale                                             | 2                | km                                  |
| $\rho$               |  | Sill area density                                                   |                  | km <sup>-2</sup>                    |

|                        |                                            |                                           |  |                      |
|------------------------|--------------------------------------------|-------------------------------------------|--|----------------------|
| $\sigma$               |                                            | Standard deviation of activation energies |  | $\text{kJ mol}^{-1}$ |
| $\tau_{\text{cond}}$   |                                            | Sill conductive cooling time              |  | yr                   |
| $\tau_{\text{decay}}$  |                                            | Sill thermogenic emissions decay time     |  | yr                   |
| $\tau_{\text{repeat}}$ | $= 1/f$                                    | Sill repeat time period                   |  | yr                   |
| $\tau_{\text{solid}}$  |                                            | Sill solidification time                  |  | yr                   |
| $\tau^*$               | $= \tau_{\text{decay}}/\tau_{\text{cond}}$ | Sill thermogenic emissions decay time     |  | yr                   |
| $\Gamma$               |                                            | Sill province areal expansion function    |  | –                    |
| $\Pi$                  |                                            | Normal probability distribution           |  | –                    |
